# Supplementary material
Source: PubMed Central journal article supplement (PMC6054474)
Supplement: NIHMS971020-supplement-1.pdf [file NIHMS971020-supplement-1.pdf]

## **SUPPLEMENTAL INFORMATION INVENTORY**

Supplemental Information includes:

### **SUPPLEMENTAL FIGURES**

- Figure S1, related to Figure 1
- Figure S2, related to Figure 2
- Figure S3, related to Figure 3
- Figure S4, related to Figure 4
- Figure S5, related to Figure 5
- Figure S6, related to Figure 6
- Figure S7, related to Figure 7
